# Supplementary material for: Baseline prognostic nutritional index and changes in pretreatment body mass index associate with immunotherapy response in patients with advanced cancer
Source: HighWire-hosted journal article supplement (doi:10.1136/jitc-2020-001674), 2020-11-01
Supplement: jitc-2020-001674supp002_data_supplement.pdf [file jitc-2020-001674supp002_data_supplement.pdf]

Supplemental Table 1. Cox proportional-hazards regression: multivariable analysis

| Variable                                      | PFS               |         | OS                |         |
|-----------------------------------------------|-------------------|---------|-------------------|---------|
|                                               | HR [95% CI]       | p-value | HR [95% CI]       | p-value |
| Overweight                                    | 1.21 [0.96, 1.52] | 0.10    | 1.00 [0.75, 1.33] | 0.97    |
| Obese                                         | 1.08 [0.83, 1.42] | 0.56    | 0.87 [0.61, 1.25] | 0.45    |
| Low PNI                                       | 1.39 [1.10, 1.75] | 0.01    | 1.63 [1.26, 2.12] | <0.001  |
| ECOG grade                                    | 1.50 [1.28, 1.76] | <0.001  | 1.88 [1.56, 2.26] | <0.001  |
| Stage                                         | 1.27 [0.95, 1.69] | 0.11    | 1.27 [0.87, 1.85] | 0.22    |
| Age                                           | 0.99 [0.98, 0.99] | 0.001   | 0.99 [0.98, 1.00] | 0.27    |
| Sex (male)                                    | 1.11 [0.89, 1.38] | 0.36    | 1.72 [1.27, 2.33] | <0.001  |
| Treatment line                                | 1.73 [1.36, 2.19] | <0.001  | 1.56 [1.17, 2.10] | 0.003   |
| ICI plus chemotherapy (ref: ICI alone)        | 1.05 [0.81, 1.35] | 0.71    | 1.08 [0.79, 1.48] | 0.63    |
| Anti-CTLA-4 plus anti-PD-1 (ref: anti-CTLA-4) | 0.45 [0.31, 0.65] | <0.001  | 0.39 [0.25, 0.62] | <0.001  |
| Anti-PD-1 or anti-PD-L1 (ref: anti-CTLA-4)    | 0.35 [0.24, 0.50] | <0.001  | 0.34 [0.22, 0.52] | <0.001  |

Supplemental Table 2. Patients with stage IV disease (n = 543)

| Variable   | PFS               |         | OS                |         |
|------------|-------------------|---------|-------------------|---------|
|            | HR [95% CI]       | p-value | HR [95% CI]       | p-value |
| Overweight | 1.16 [0.91, 1.48] | 0.24    | 0.99 [0.73, 1.34] | 0.95    |
| Obese      | 1.11 [0.83, 1.47] | 0.49    | 0.89 [0.60, 1.31] | 0.54    |

Supplemental Table 3. Patients with lung cancer (n = 128)

| Variable   | PFS               |         | OS                |         |
|------------|-------------------|---------|-------------------|---------|
|            | HR [95% CI]       | p-value | HR [95% CI]       | p-value |
| Overweight | 1.29 [0.79, 2.10] | 0.31    | 1.00 [0.57, 1.74] | 0.99    |
| Obese      | 1.24 [0.70, 2.20] | 0.47    | 1.13 [0.54, 2.35] | 0.74    |
